# Supplementary material
Source: PubMed Central journal article supplement (PMC2629286)
Supplement: 0811209106_0811209106SI.pdf [file 0811209106_0811209106SI.pdf]

# Supporting Information

Barabutis and Schally 10.1073/pnas.0811209106

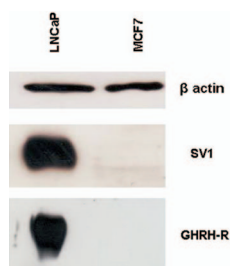

Fig. S1. Western blot analysis of expression of SV1 and GHRH-R in LNCaP prostate cancer cells. MCF-7 breast cancer cells were used as negative control.

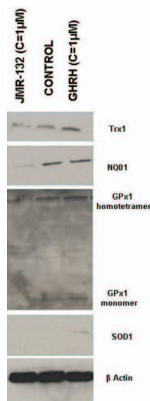

**Fig. S2.** Western blot analysis of expression of the antioxidant enzymes Trx1, NQO1, GPx1, and SOD1 in LNCaP prostate cancer cells after 72-h exposure to GHRH antagonist JMR-132 and GHRH(1-29)NH<sub>2</sub>;  $n = 2$ .
